# Supplementary material
Source: PubMed Central journal article supplement (PMC3348656)
Supplement: NIHMS372496-supplement-01.pdf [file NIHMS372496-supplement-01.pdf]

**Table S1. Parameter Values Used in the Numerical Computation, Related to Figure 4**

| <i>Parameter</i>   | <i>Description</i>                     | <i>Value</i>                        |
|--------------------|----------------------------------------|-------------------------------------|
| $h$                | Height of each of the three scalae     | 500 $\mu\text{m}$                   |
| $\rho$             | Fluid density                          | $10^3 \text{ kg}\cdot\text{m}^{-3}$ |
| $T$                | Surface tension of Reissner's membrane | $220 \text{ mN}\cdot\text{m}^{-1}$  |
| $w$                | Width of Reissner's membrane           | 700 $\mu\text{m}$                   |
| $w_{\text{BM}}(x)$ | Width of the basilar membrane          | $(100+400\cdot x) \mu\text{m}$      |
